# Supplementary material
Source: PubMed Central journal article supplement (PMC6535226)
Supplement: NIHMS924001-supplement-Supp_TableS1.pdf [file NIHMS924001-supplement-Supp_TableS1.pdf]

1 **Supplementary material**

2

3 **Supplementary Table 1.** Summary of baseline patient-, disease- and treatment-related

4 factors associated with serum infliximab trough concentrations quartiles.

|                                               | <b>Q1</b><br><b>(N=18)</b> | <b>Q2</b><br><b>(N=17)</b> | <b>Q3</b><br><b>(N=17)</b> | <b>Q4</b><br><b>(N=18)</b> | <b>p<sup>a</sup></b> |
|-----------------------------------------------|----------------------------|----------------------------|----------------------------|----------------------------|----------------------|
| Male, (%)                                     | 14 (78)                    | 10 (59)                    | 5 (29)                     | 9 (50)                     | 0.035                |
| Age at diagnosis, median (IQR), y             | 26 (22-41)                 | 24 (19-34)                 | 25 (23-54)                 | 29 (21-44)                 | 0.471                |
| Age at infliximab initiation, median (IQR), y | 28 (32-56)                 | 34 (26-43)                 | 38 (33-57)                 | 40 (24-50)                 | 0.552                |
| Disease duration, median (IQR), (years)       | 1 (3-16)                   | 8 (4-13)                   | 8 (1-13)                   | 5 (2-6)                    | 0.621                |
| Pancolitis <sup>b</sup> , (%)                 | 11 (61)                    | 9 (53)                     | 5 (29)                     | 7 (39)                     | 0.092                |
| Smoking ever, (%)                             | 3 (17)                     | 3 (18)                     | 7 (41)                     | 3 (17)                     | 0.617                |
| Prior infliximab optimization, (%)            | 10 (56)                    | 12 (71)                    | 10 (59)                    | 11 (61)                    | 0.914                |
| Concomitant IMM <sup>c</sup> , (%)            | 6 (33)                     | 4 (24)                     | 7 (41)                     | 8 (44)                     | 0.324                |
| BMI, median (IQR), Kg/m <sup>2</sup>          | 25 (22-32)                 | 24 (23-29)                 | 27 (24-28)                 | 25 (23-27)                 | 0.583                |
| CRP >5 mg/L, (%)                              | 1/4 (25)                   | 4/4 (100)                  | 3/3 (100)                  | 2/2 (100)                  | 0.026                |
| Albumin, median (IQR), g/dL                   | 3.8 (3.1-3.9)              | 4.3 (3.9-4.4)              | N/A <sup>d</sup>           | 4.2 (3.9-4.4)              | 0.030                |
| ATI, (%)                                      | 8/17 (48)                  | 0 (0)                      | 0 (0)                      | 0 (0)                      | <0.001               |

5 <sup>a</sup>The Kruskal-Wallis and the chi-square test (linear-by-linear association) were used to6 compare continuous or discrete variables respectively; <sup>b</sup>according to Montreal7 classification; <sup>c</sup>thiopurines; <sup>d</sup>only one value.

8 BMI: body mass index; CRP: C-reactive protein; IMM: immunomodulators; IQR:

9 interquartile range; TC: trough concentration; y: years; N/A: not applicable; ATI:

10 antibodies to infliximab.
